# Supplementary material for: Human immunodeficiency virus positive status disclosure to a sexual partner and its determinant factors in Ethiopia: a systematic review and meta-analysis
Source: BMC Infect Dis. 2020 May 29;20:382. doi: 10.1186/s12879-020-05081-9 (PMC7257234; doi:10.1186/s12879-020-05081-9)
Supplement: Supplementary file 1 — Additional file 1. [file 12879_2020_5081_MOESM1_ESM.xlsx]

## Sheet: Sheet1
authorName	Year of study	Region	Study population	Sample size	Response Rate	prevalence(%)	logp	logSE	LBP	UBP
Alema H et.at	2013	Tigray	Adult PLWH	361	99.7	41.8	3.7329	2.59595	36.7119	46.8881
Alemayehu M et.al	2013	Tigray	Women PLWH	315	100	63.8	4.15575	2.70775	58.4928	69.1072
Bedilu D et.al	2017	SNNPE	Women PLWH	207	100	72.9	4.28909	3.08932	66.8449	78.9551
Binega F et.al	2017	Amhara	Adult PLWH	362	99.7	71	4.26268	2.38492	66.3256	75.6744
Daniel A et.al	2013	Amhara	HIV positive pregnant	263	100	89.7	4.49647	1.87429	86.0264	93.3736
Endalew G et.al	2011	Addis Abeba	HIV positive pregnant	107	95.5	73	4.29046	4.29192	64.5878	81.4122
Erku T et.al	2010	Amhara	Adult PLWH	334	100	76.8	4.3412	2.30968	72.273	81.327
Gadisa T et.al	2013	Oromia	Adult PLWH	686	100	91.1	4.51196	1.08716	88.9692	93.2308
Gari T et.al	2008	SNNPE	Women PLWH	384	100	85.7	4.45085	1.78646	82.1985	89.2015
Genet M et.al	2012	Tigray	Adult PLWH	324	100	57.4	4.05004	2.74719	52.0155	62.7845
Getinet K et.al	2017	Oromia	positive pregnant women	337	99.7	83	4.41884	2.0462	78.9894	87.0106
Kassaye K et.al	2007	Oromia	Adult PLWH	640	99.9	90.2	4.50203	1.17524	87.8965	92.5035
Noah G et.al	2015	Addis Abeba	Adult PLWH	676	100	82.5	4.4128	1.46141	79.6356	85.3644
Reda A et.al	2010	Harer	Adult PLWH	606	100	66.3	4.19419	1.92015	62.5365	70.0635
Seid M et.al	2009	Amhara	Adult PLWH	360	100	93.1	4.53367	1.33582	90.4818	95.7182
Shewaye F et.al	2013	Oromia	Adult PLWH	360	99.5	84.9	4.44147	1.88708	81.2013	88.5987
Tesfaye T et.al	2014	Oromia	Adult PLWH	351	98.1	33.33	3.50646	2.51611	28.3984	38.2616
Tsige D et.al	2017	Oromia	Adult PLWH	411	100	52.6	3.96272	2.46298	47.7726	57.4274
		Being Member of HIV association
Name	Year of study	Region	design	popn	S.Size	Prevalence	a	b	c	d	OR	Log OPD	SELogORPD
Alema H et at	2013	Tigray	C.Sectional	Adult PLWH	361	41.8	109	7	180	65	5.62302	1.72687	0.172972
Genet M et al	2012	Tigray	C.Sectional	Adult PLWH	324	57.4	79	36	107	102	2.0919	0.738073	0.0595857
Seid M et al	2009	Amhara	C.Sectional	Adult PLWH	360	93.1	138	3	197	22	5.13706	1.63648	0.39111
Getnet K et al	2017	Oromia	C.Sectional	HIV positive pregnant	337	83	204	22	86	25	2.69556	0.991606	0.101984
		Got Pre-Test counselling
Name	Year of study	Region	design	Population	S.Size	Prevalence	a	b	c	d	OR	Log OPD	SELogORPD
Genet M et al	2012	Tigray	C.Sectional	Adult PLWH	324	57.4	140	72	46	66	2.78986	1.02599	0.0579224
Alemayehu M et al	2013	Tigray	C.Sectional	Women PLWHA	315	63.8	177	88	24	26	2.17898	0.778856	0.0971416
Binega F et al	2017	Amhara	C.Sectional	Adult PLWH	362	71	190	54	67	51	2.67828	0.985173	0.0583149
Tsige D et.al	2017	Oromia	C.Sectional	Adult PLWH	411	52.6	198	18	115	80	7.65217	2.03499	0.0818017
Bedilu D et.al	2017	SNNPE	C.Sectional	Women PLWH	207	72.9	98	18	53	38	3.90356	1.36189	0.110943
Erku T et.al	2010	Amhara	C.Sectional	Adult PLWH	334	76.8	225	28	31	50	12.9608	2.56193	0.0924168
		Prior Discussion about HIV Test
Authors	Year of study	Region	design	Population	S.Size	Prevalence	a	b	c	d	OR	Log OPD	SELogORPD
Alema H et.at	2013	Tigray	Cross-sectional	Adult PLWH	361	80.1	76	6	213	66	3.92488	1.36734	0.199671
Kassaye K et.al	2007	Oromia	Cross-sectional	Adult PLWH	705	90.8	546	23	94	42	10.6068	2.3615	0.0797576
Genet M et.al	2012	Tigray	Cross-sectional	Adult PLWH	324	57.4	122	11	64	127	22.0085	3.09143	0.122605
Seid M et.al	2009	Amhara	Cross-sectional	Adult PLWH	360	93.1	112	2	184	23	7	1.94591	0.557842
Alemayehu M et.al	2013	Tigray	Cross-sectional	Adult PLWH	315	63.8	86	13	115	101	5.81003	1.75959	0.107148
Endalew G et.al	2011	Addis Abeba	Cross-sectional	Adult PLWH	107	73	49	2	29	27	22.8103	3.12721	0.591928
Shewaye F et.al	2013	Oromia	Cross-sectional	Adult PLWH	360	84.9	69	2	216	49	7.82639	2.0575	0.539531
		Knowing Partners HIV status
Authors	Year of study	Region	design	Population	S.Size	Prevalence	a	b	c	d	OR	Log OPD	SELogORPD
Alema H et.at	2013	Tigray	Cross-sectional	Adult PLWH	361	80.1	152	11	17	6	4.87701	1.58453	0.322978
Kassaye K et.al	2007	Oromia	Cross-sectional	Adult PLWH	705	90.8	556	4	84	61	100.94	4.61453	0.280097
Genet M et.al	2012	Tigray	Cross-sectional	Adult PLWH	324	57.4	151	14	35	124	38.2122	3.64316	0.114687
Seid M et.al	2009	Amhara	Cross-sectional	Adult PLWH	360	93.1	278	2	57	23	56.0877	4.02692	0.564619
Alemayehu M et.al	2013	Tigray	Cross-sectional	Adult PLWH	315	63.8	139	11	62	103	20.9927	3.04417	0.123941
Erku T et.al	2010	Amhara	Cross-sectional	Adult PLWH	334	76.8	231	26	25	52	18.48	2.91669	0.102021
Gari T et.al	2008	SNNPE	Cross-sectional	Adult PLWH	346	92	200	3	102	41	26.7974	3.2883	0.372527
Noah G et.al	2015	Addis Abeba	Cross-sectional	Adult PLWH	676	82.5	506	28	52	89	30.9299	3.43172	0.0681573
Tsige D et.al	2017	Oromia	Cross-sectional	Adult PLWH	411	52.6	180	101	36	94	4.65347	1.53761	0.0538726
Bedilu D et.al	2017	SNNPE	C.Sectional	Women PLWH	207	72.9	114	17	37	39	7.06836	1.95563	0.120264

## Sheet: Sheet2
	Was the sample frame appropriate to address the target population?	Were study participants sampled in an appropriate way?	Were study participants sampled in an appropriate way?	Were the study subjects and the setting described in detail?	Was the data analysis conducted with sufficient coverage of the identified sample?	Were valid methods used for the identification of the condition?	Was the condition measured in a standard, reliable way for all participants?	Was there appropriate statistical analysis?	Was the response rate adequate, and if not, was the low response rate managed appropriately?
Alema H et.at(31)
Alemayehu M et.al(32)
Bedilu D et.al(33)
Binega F et.al(27)
Daniel A et.al(28)
Endalew G et.al(35)
Erku T et.al(29)
Gadisa T et.al(21)
Gari T et.al(34)
Genet M et.al(8)
Getinet K et.al(22)
Kassaye K et.al(23)
Kassaye K et.al(24)
Noah G et.al(36)
Reda A et.al(37)
Seid M et.al(14)
Shewaye F et.al(25)
Tesfaye T et.al (1)
Tsige D et.al(26)
